# Supplementary material
Source: publisher figshare collection journal article supplement (https://geolsoc.figshare.com/ndownloader/files/5426957)
Supplement: Supplementary file 1 [file 5426957]

Kirk,"Kirk, H.J.C. 1968. The igneous rocks of Sarawak and Sabah. Geological Survey of Malaysia, Borneo Region Bulletin, 5, 210 pp."
R&W,"Reinhard, M. & Wenk, E. 1951. Geology of the colony of North Borneo. Geological Survey Department of the British Territories in Borneo Bulletin, 1, 160 pp."
Sperber,"Sperber, C.M. 2009. The thermotectonic development of Mount Kinabalu,Sabah, Malaysia: Constraints from low-temperature thermochronology. Ph.D. Thesis, University of London, 501 pp."
V&F,"Vogt, E.T. & Flower, M.F.J. 1989. Genesis of the Kinabalu (Sabah) granitoid at a subduction-collision junction. Contributions to Mineralogy and Petrology, 103, 493-509."
Ward,"Ward, C.D., McArthur, J.M. & Walsh, J.N. 1992. Rare earth element behaviour during evolution and alteration of the Dartmoor Granite, SW England. Journal of Petrology, 33, 783-815."
